# Supplementary material for: Facial Skin Microbiome: Aging-Related Changes and Exploratory Functional Associations with Host Genetic Factors, a Pilot Study
Source: MDPI journal article supplement (doi:10.3390/biomedicines11030684), 2023-02-23
Supplement: s1 [file s1]

**Table S1.** Number of reads before and after the FASTQ processing.

| sample-id | input  | filtered | denoised | merged | percentage of input merged | non-chimeric | percentage of input non-chimeric |
|-----------|--------|----------|----------|--------|----------------------------|--------------|----------------------------------|
| A1        | 31838  | 23855    | 23594    | 23238  | 72.99                      | 22884        | 71.88                            |
| A2        | 50115  | 37282    | 37050    | 36767  | 73.37                      | 36370        | 72.57                            |
| A3        | 35495  | 27417    | 27204    | 26927  | 75.86                      | 26717        | 75.27                            |
| A4        | 54113  | 43057    | 42911    | 42686  | 78.88                      | 41596        | 76.87                            |
| A5        | 38042  | 30507    | 30371    | 30152  | 79.26                      | 29341        | 77.13                            |
| B1        | 48303  | 37296    | 37108    | 36835  | 76.26                      | 35881        | 74.28                            |
| B2        | 44514  | 36254    | 36143    | 35996  | 80.86                      | 35533        | 79.82                            |
| B3        | 360535 | 298217   | 297441   | 296096 | 82.13                      | 292288       | 81.07                            |
| B4        | 20647  | 15331    | 15104    | 14701  | 71.2                       | 14389        | 69.69                            |
| B5        | 111386 | 89854    | 89321    | 87987  | 78.99                      | 85011        | 76.32                            |
| C1        | 101250 | 81896    | 81540    | 80707  | 79.71                      | 77247        | 76.29                            |
| C2        | 95544  | 77079    | 76958    | 76775  | 80.36                      | 75684        | 79.21                            |
| C3        | 34179  | 27667    | 27443    | 27212  | 79.62                      | 26855        | 78.57                            |
| C4        | 114346 | 89608    | 89395    | 88856  | 77.71                      | 87437        | 76.47                            |
| C5        | 78973  | 61830    | 61643    | 61337  | 77.67                      | 59857        | 75.79                            |

**Table S2.** Comparison of the abundance of single ASV.

| Num * | Den * | Taxonomic level | Basemean  | Log2FC | lfcSE* | stat   | Adjusted p-value | Taxon                   |
|-------|-------|-----------------|-----------|--------|--------|--------|------------------|-------------------------|
| B     | A     | Phylum          | 33.933    | 21.139 | 2.751  | 7.684  | 2.16E-13         | <i>Campilobacterota</i> |
| C     | A     | Phylum          | 33.933    | 20.948 | 2.751  | 7.614  | 3.73E-13         | <i>Campilobacterota</i> |
| B     | A     | Phylum          | 11.135    | 18.921 | 3.580  | 5.285  | 8.81E-07         | <i>Spirochaetota</i>    |
| C     | A     | Phylum          | 11.135    | 20.032 | 3.577  | 5.600  | 1.50E-07         | <i>Spirochaetota</i>    |
| B     | A     | Class           | 17806.818 | -1.475 | 0.541  | -2.726 | 0.043323         | <i>Actinobacteria</i>   |
| C     | B     | Class           | 17806.818 | 1.704  | 0.541  | 3.148  | 0.022155         | <i>Actinobacteria</i>   |
| B     | A     | Class           | 46.616    | 20.843 | 3.249  | 6.415  | 3.80E-09         | <i>Campylobacteria</i>  |
| C     | A     | Class           | 46.616    | 21.668 | 3.249  | 6.669  | 6.93E-10         | <i>Campylobacteria</i>  |
| B     | A     | Class           | 511.070   | 2.970  | 0.835  | 3.559  | 0.003353         | <i>Negativicutes</i>    |

|   |   |        |              |                 |           |                |          |                                    |
|---|---|--------|--------------|-----------------|-----------|----------------|----------|------------------------------------|
| C | B | Class  | 511.070      | -2.996          | 0.83<br>4 | -<br>3.59<br>3 | 0.008831 | <i>Negativicutes</i>               |
| B | A | Order  | 17.218       | 19.82<br>7      | 2.92<br>7 | 6.77<br>3      | 4.77E-10 | <i>Absconditabacteriales_(SR1)</i> |
| C | A | Order  | 17.218       | 20.12<br>3      | 2.92<br>8 | 6.87<br>3      | 2.17E-10 | <i>Absconditabacteriales_(SR1)</i> |
| C | B | Order  | 3606.27<br>3 | 3.408           | 1.00<br>4 | 3.39<br>3      | 0.023892 | <i>Corynebacteriales</i>           |
| B | A | Order  | 6.885        | 18.79<br>7      | 3.36<br>0 | 5.59<br>4      | 5.11E-07 | <i>Cytophagales</i>                |
| C | A | Order  | 6.885        | 18.78<br>5      | 3.36<br>3 | 5.58<br>6      | 4.01E-07 | <i>Cytophagales</i>                |
| C | A | Order  | 13.499       | -<br>22.04<br>5 | 3.65<br>4 | -<br>6.03<br>3 | 3.70E-08 | <i>Exiguobacterales</i>            |
| C | B | Order  | 13.499       | -<br>21.96<br>0 | 3.65<br>3 | -<br>6.01<br>2 | 1.27E-07 | <i>Exiguobacterales</i>            |
| B | A | Family | 6.172        | 18.97<br>7      | 3.37<br>8 | 5.61<br>8      | 1.19E-06 | <i>Nocardiodaceae</i>              |
| C | A | Family | 6.172        | 18.39<br>3      | 3.38<br>4 | 5.43<br>6      | 1.83E-06 | <i>Nocardiodaceae</i>              |
| B | A | Genus  | 51.023       | 21.53<br>3      | 3.26<br>3 | 6.59<br>9      | 1.08E-08 | <i>Abiotrophia</i>                 |
| C | A | Genus  | 51.023       | 21.60<br>9      | 3.26<br>4 | 6.62<br>1      | 6.43E-09 | <i>Abiotrophia</i>                 |
| B | A | Genus  | 16.694       | 20.54<br>0      | 3.45<br>2 | 5.95<br>0      | 2.33E-07 | <i>Flavobacterium</i>              |
| C | A | Genus  | 16.694       | 19.28<br>1      | 3.45<br>8 | 5.57<br>5      | 1.13E-06 | <i>Flavobacterium</i>              |
| B | A | Genus  | 53.188       | 13.40<br>7      | 3.73<br>8 | 3.58<br>7      | 0.017489 | <i>Lactococcus</i>                 |
| C | A | Genus  | 53.188       | 22.79<br>1      | 3.65<br>0 | 6.24<br>3      | 3.72E-08 | <i>Lactococcus</i>                 |
| B | A | Genus  | 14.211       | 18.44<br>3      | 3.65<br>7 | 5.04<br>4      | 2.98E-05 | <i>Treponema</i>                   |
| C | A | Genus  | 14.211       | 20.33<br>6      | 3.65<br>3 | 5.56<br>7      | 1.13E-06 | <i>Treponema</i>                   |

\*"Num "and the" Den "are standard names used for DESeq2, they means respectively Numerator "vs".

Denominator ", representing the two compared groups. \*\* Log2 Fold Change Standard Error.

**Table S3.** Functional profiles associated with potentially expressed microbial genes in groups A and B.

| KO entry | EC number            | Gene symbol       | Description                                  | Different class | LDA Score (log10) |
|----------|----------------------|-------------------|----------------------------------------------|-----------------|-------------------|
| K01270   | 3.4.13               | <i>pepD</i>       | dipeptidase D                                | B               | 2.041494095       |
| K12267   | 1.8.4.11 / 1.8.4.12  | <i>msrAB</i>      | peptide methionine sulfoxide reductase       | B               | 2.035527          |
| K05366   | 2.4.1.129 / 3.4.16.4 | <i>mrcA</i>       | penicillin-binding protein                   | B               | 2.098276119       |
| K01647   | 2.3.3.1              | <i>CS, gltA</i>   | citrate synthase                             | A               | 2.091586362       |
| K01895   | 6.2.1.1              | <i>ACSS, acs</i>  | acetyl-CoA synthetase                        | A               | 2.354463699       |
| K03750   | 2.10.1.1             | <i>moeA</i>       | molybdopterin molybdotransferase             | A               | 2.153599221       |
| K02221   |                      | <i>yggT</i>       | uncharacterized protein                      | A               | 2.113230439       |
| K00241   |                      | <i>sdhC, frdC</i> | succinate dehydrogenase / fumarate reductase | A               | 2.067092941       |
| K00240   | 1.3.5.1 / 1.3.5.4    | <i>sdhB, frdB</i> | succinate dehydrogenase / fumarate reductase | A               | 2.048086623       |

EC= enzymatic class, if missing it means that there are no correspondence between the two compared databases

**Table S4.** Comparison of the abundance of single ASV.

| Num*     | Den*   | Taxonomic level | baseMean | log2FC* | lfcSE | stat  | Adjusted p-value | Taxon                      |
|----------|--------|-----------------|----------|---------|-------|-------|------------------|----------------------------|
| Dry Skin | Normal | Phylum          | 15051.04 | -1.81   | 0.58  | -3.13 | 1.50E-02         | <i>Firmicutes</i>          |
| Dry Skin | Normal | Class           | 16.31    | 23.76   | 3.02  | 7.86  | 9.78E-14         | <i>Spirochaetia</i>        |
| Dry Skin | Normal | Class           | 11399.57 | -1.54   | 0.46  | -3.31 | 7.88E-03         | <i>Bacilli</i>             |
| Dry Skin | Normal | Class           | 425.21   | 1.81    | 0.63  | 2.90  | 2.35E-02         | <i>Alphaproteobacteria</i> |
| Dry Skin | Normal | Class           | 3624.56  | -2.53   | 0.90  | -2.81 | 2.48E-02         | <i>Clostridia</i>          |
| Dry Skin | Normal | Genus           | 15.46    | -21.81  | 3.06  | -7.12 | 2.50E-10         | <i>Negativicoccus</i>      |
| Dry Skin | Normal | Genus           | 1120.43  | -5.62   | 1.56  | -3.61 | 3.60E-02         | <i>Peptoniphilus</i>       |

\*"Num" and the "Den" are the standard names used for DESeq2 uses, they means respectively Numerator "vs". Denominator, representing the two compared groups. \*\* Log2 Fold Change Standard Error.

**Table S5.** Functional profiles associated with potentially expressed microbial genes in groups Dry and normal skin.

| KO Entry | EC number | Gene symbol                 | Description                                | Different Class  | LDA Score (log10) |
|----------|-----------|-----------------------------|--------------------------------------------|------------------|-------------------|
| K00116   | 1.1.5.4   | <i>Mqo</i>                  | malate dehydrogenase                       | hydratation < 45 | 2.171081          |
| K03311   |           | <i>TC.LIVCS</i>             | cation transporter                         | hydratation < 45 | 2.022262          |
| K01258   | 3.4.11.4  | <i>pepT</i>                 | tripeptide peptidase                       | hydratation < 45 | 2.00751           |
| K03100   | 3.4.21.89 | <i>lepB</i>                 | enzyme signal peptidase                    | hydratation < 45 | 2.04445           |
| K07491   |           | <i>rayT</i>                 | Reparation associated tyrosine transposase | hydratation < 45 | 2.114414          |
| K07498   |           | <i>putative transposase</i> | putative transposase                       | hydratation < 45 | 2.275746          |
| K00712   | 2.4.1.52  | <i>tagE</i>                 | alpha-glucosyltransferase                  | hydratation < 45 | 2.082537          |
| K03406   |           | <i>Mcp</i>                  | chemotaxis protein                         | hydratation > 45 | 2.15397           |
| K03088   |           | <i>rpoE</i>                 | RNA polymerase sigma-70 factor             | hydratation > 45 | 2.258803          |
| K03496   |           | <i>parA, soj</i>            | chromosome partitioning protein            | hydratation > 45 | 2.091799          |

EC= enzymatic class, if missing it means that there are no correspondence between the two compared databases

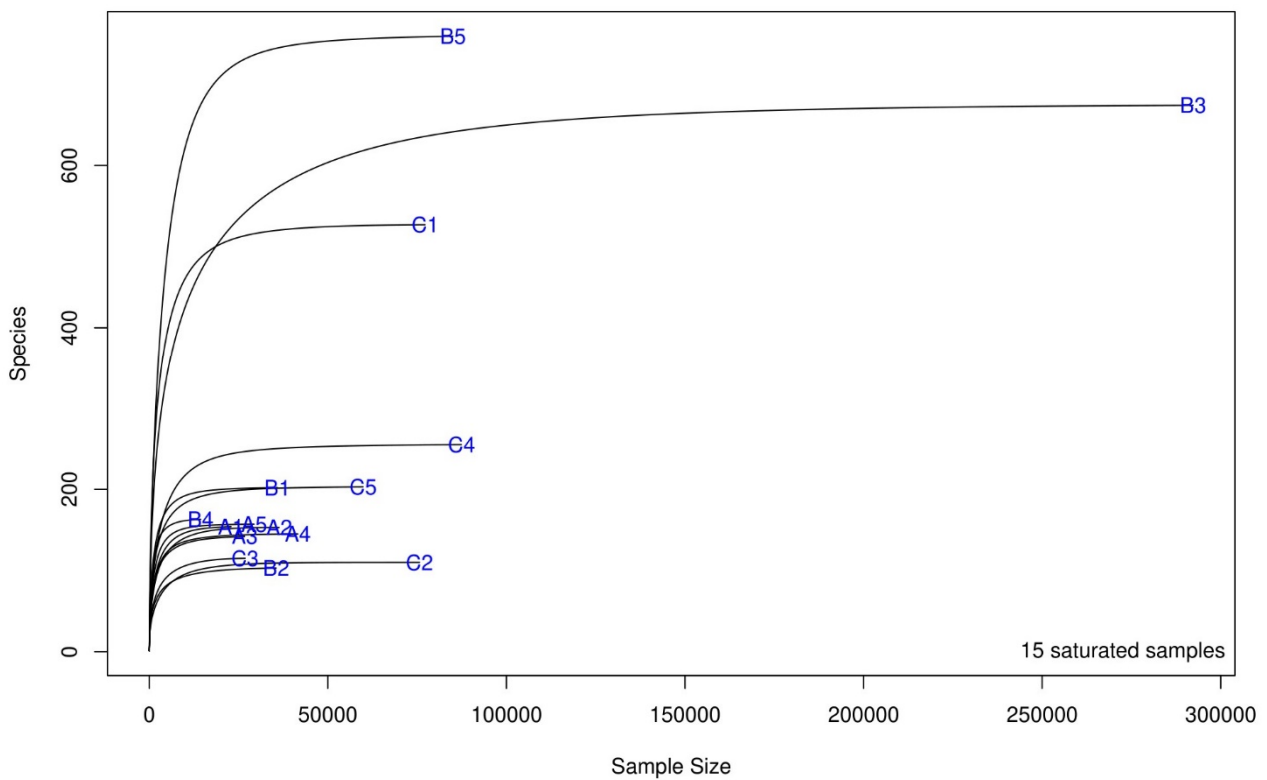

**Figure S1. Rarefaction analysis, performed to check the sample saturation after the reads discarded by DADA2.**
